# Supplementary material
Source: ML conference proceedings conference paper supplement (https://www.ecva.net/papers/eccv_2022/papers_ECCV/html/136830583_ECCV_2022_paper.php)
Supplement: Supplementary file 1 [file 136830583-supp.zip]

# Supplementary Material for “Ensemble Learning Priors Driven Deep Unfolding for Scalable Snapshot Compressive Imaging”

Chengshuai Yang<sup>[0000–0003–2840–5344]</sup>, Shiyu Zhang<sup>[0000–0001–7111–3895]</sup>, and  
Xin Yuan<sup>[0000–0002–8311–7524]</sup>

School of Engineering, Westlake University, Hangzhou, Zhejiang 310030, China  
integrityyang@gmail.com {zhangshiyu, xyuan}@westlake.edu.cn

## 1 Denoising network structure

In this section, we provide the detailed network structure of the proposed fully convolutional network backbone. The first prior network structure is shown in Fig. S1 and the non-first in Fig. S2. Here,  $\mathbf{u}^0 = \mathbf{x}^0 - \frac{\lambda_2^0}{\gamma_2}$  and  $\mathbf{u}^{i-1} = \mathbf{x}^{i-1} - \frac{\lambda_2^{i-1}}{\gamma_2}$ .

## 2 Scalable comparison

In this section, we test four different size datasets:  $256 \times 256 \times 24$ ,  $512 \times 512 \times 10$ ,  $1024 \times 1024 \times 18$  and  $1536 \times 1536 \times 12$ . These four datasets have different sizes not only in spatial dimension but also in *temporal dimension*. Here, we use GAP as the PnP framework [2]. Thus, we can denote the GAP-FFDNet (GAP-FastDVDnet) as PnP-FFDNet (PnP-FastDVDnet). To help compare, the detailed results are presented, including tables, images and videos. For videos, please refer to the folder ‘video/ scalable’(<https://github.com/integritynoble/ELP-Unfolding/tree/master/video>).

### 2.1 Data size $256 \times 256 \times 24$ , ( $B=24$ ).

In this case, the dataset is the same with the benchmark but the compression ratio  $B$  is now set to 24. Because of high compressed ratio, which is three times of the benchmark, the reconstruction accuracy is reduced but our proposed ELP-Unfolding but we can still obtain the acceptable results (31.53 dB for PSNR), as show in Table S1 and Fig. S3. In this case, one measurement is used to test. As shown in Fig. S3, FFDNet just gets the deformed shapes because of high compressed ratio. But our proposed ELP-Unfolding achieves clearer images than other three algorithms.

### 2.2 Data size $512 \times 512 \times 10$ , ( $B=10$ ).

In this case, the spatial size is  $512 \times 512$  and temporal size is 10. Here, three measurements are used to test. The dataset is cropped from the Ultra Video

Group (UVG) dataset [1]. The results are shown in Table S2 and Fig. S4. Because of low compressed ratio and large spatial size, high reconstruction can easily be achieved. But our proposed ELP-unfolding still get the best result at the shortest testing time.

### 2.3 Data size $1024 \times 1024 \times 18$ , ( $B=18$ ).

In this case, the spatial size is  $1024 \times 1024$  and temporal size is 18. Here, four measurements are used to test. The dataset is also cropped from the Ultra Video Group (UVG) dataset [1]. The results are shown in Table S3 and Fig. S5. Because of high compressed ratio, the reconstruction accuracy of other algorithms gets degraded, especially GAP-TV. By contrast, our proposed ELP-unfolding still keeps high reconstruction accuracy (36.00 dB for PSNR).

### 2.4 Data size is $1536 \times 1536 \times 12$ , ( $B=12$ ).

In this case, the spatial size is  $1536 \times 1536$  and temporal size is 12. Here, one measurement is used to test. The dataset is also cropped from the Ultra Video Group (UVG) dataset [1]. The results are shown in Table S4 and Fig. S6. Because of large spatial size, it is not difficult to get good reconstruction results for all algorithms. However, as shown in the zoomed area, our proposed ELP-unfolding gets more details.

Therefore, these four datasets indicate that our proposed ELP-unfolding method has achieved excellent performance for SCI reconstruction not only in model's scalability but also in accuracy and speed.

## 3 Real data

What's more, all the real dynamic scenes are made into videos. Please refer to the folder 'video/ real'(<https://github.com/integritynoble/ELP-Unfolding/tree/master/video>).

Table S1: Scalability: Data size is  $256 \times 256 \times 24$ , ( $B=24$ ). PSNR (left in dB) and SSIM (right) are shown

| Algorithm            | Kobe                | Runner              | Drop                | Crash               | Aerial              | Average             | Run time (s)      |
|----------------------|---------------------|---------------------|---------------------|---------------------|---------------------|---------------------|-------------------|
| GAP-TV [2]           | 23.27, 0.680        | 25.06, 0.796        | 29.41, 0.907        | 22.60, 0.729        | 22.87, 0.728        | 24.64, 0.768        | 2.78(CPU)         |
| PnP-FFDNet [3]       | 20.31, 0.606        | 22.60, 0.747        | 25.76, 0.846        | 19.91, 0.679        | 19.97, 0.646        | 21.71, 0.705        | 5.96(GPU)         |
| PnP-FastDVDnet [4]   | 23.34, 0.695        | 27.83, 0.867        | 31.75, 0.952        | 24.60, 0.801        | 23.82, 0.756        | 26.27, 0.814        | 17.84(GPU)        |
| ELP-Unfolding (Ours) | <b>28.68, 0.879</b> | <b>34.71, 0.950</b> | <b>40.01, 0.986</b> | <b>27.50, 0.910</b> | <b>26.75, 0.864</b> | <b>31.53, 0.918</b> | <b>0.257(GPU)</b> |

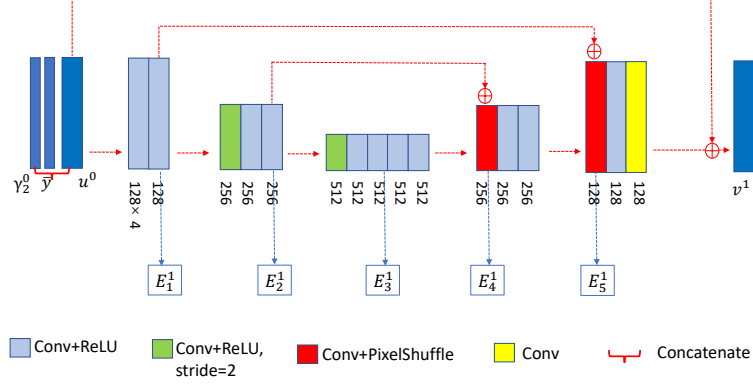

Fig. S1: The first denoising prior network structure

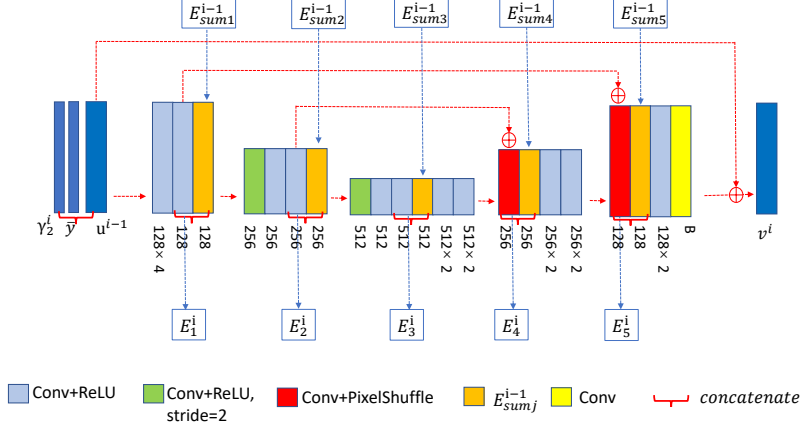

Fig. S2: The non-first denoising prior network structure

Table S2: Scalability: Data size is  $512 \times 512 \times 10$ , ( $B=10$ ). PSNR (left in dB) and SSIM (right) are shown

| Algorithm            | Beauty512           | Bosphorus512        | HoneyBee512         | Jockey512           | ShakeNDry512        | Average             | Run time (s)      |
|----------------------|---------------------|---------------------|---------------------|---------------------|---------------------|---------------------|-------------------|
| GAP-TV [2]           | 36.37, 0.910        | 33.63, 0.893        | 37.62, 0.947        | 32.68, 0.899        | 32.66, 0.836        | 34.59, 0.897        | 4.99(CPU)         |
| PnP-FFDNet [3]       | 38.78, 0.922        | 37.23, 0.932        | 37.68, 0.945        | 37.60, 0.937        | 32.59, 0.832        | 36.78, 0.914        | 8.23(GPU)         |
| PnP-FastDVDnet [4]   | 37.98, 0.915        | 35.49, 0.899        | 40.44, 0.957        | 36.74, 0.921        | 31.84, 0.808        | 36.50, 0.900        | 27.36(GPU)        |
| ELP-Unfolding (Ours) | <b>40.58, 0.940</b> | <b>40.85, 0.960</b> | <b>43.05, 0.970</b> | <b>40.26, 0.956</b> | <b>34.52, 0.876</b> | <b>39.85, 0.940</b> | <b>0.896(GPU)</b> |

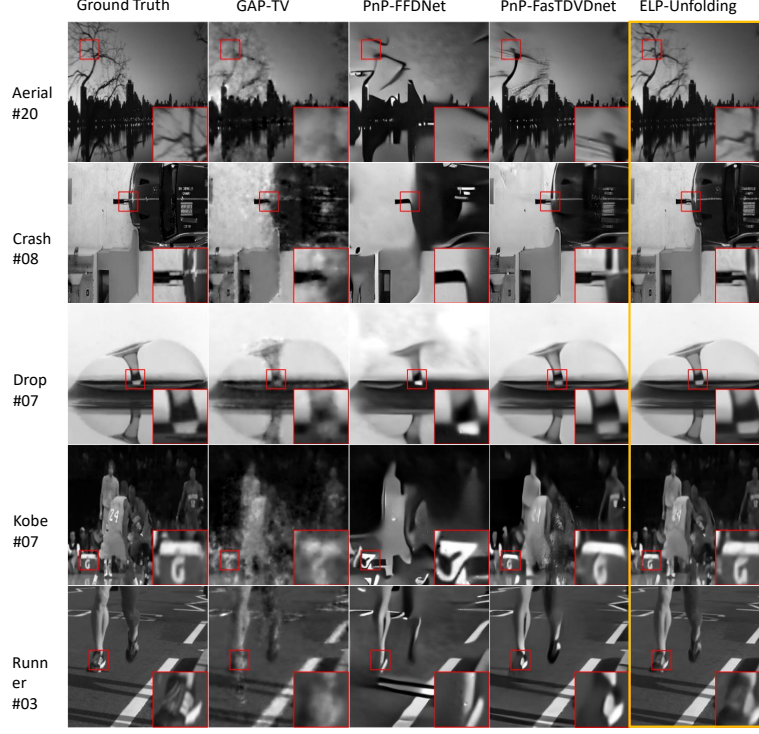Fig. S3: Scalability: Data size is  $256 \times 256 \times 24$ .Table S3: Scalability: Data size is  $1024 \times 1024 \times 18$ , ( $B=18$ ). PSNR (left in dB) and SSIM (right) are shown

| Algorithm            | Beauty1024          | Jockey1024          | ReadySteadyGo1024   | ShakeNDry1024       | YachtRide1024       | Average             | Run time (s)      |
|----------------------|---------------------|---------------------|---------------------|---------------------|---------------------|---------------------|-------------------|
| GAP-TV [2]           | 34.50, 0.873        | 28.13, 0.815        | 25.78, 0.755        | 32.19, 0.861        | 26.32, 0.761        | 29.38, 0.813        | 71.83(CPU)        |
| PnP-FFDNet [3]       | 37.15, 0.898        | 31.42, 0.896        | 28.78, 0.858        | 29.81, 0.793        | 25.99, 0.787        | 30.63, 0.846        | 90.49(GPU)        |
| PnP-FastDVDnet [4]   | 35.54, 0.889        | 33.52, 0.927        | 32.28, 0.911        | 32.65, 0.849        | 30.51, 0.864        | 32.90, 0.888        | 249.41(GPU)       |
| ELP-Unfolding (Ours) | <b>38.95, 0.916</b> | <b>38.44, 0.948</b> | <b>34.07, 0.924</b> | <b>35.42, 0.902</b> | <b>33.10, 0.909</b> | <b>36.00, 0.920</b> | <b>3.575(GPU)</b> |

Table S4: Scalability: Data size is  $1536 \times 1536 \times 12$ ,  $B=12$ . PSNR (left in dB) and SSIM (right) are shown

| Algorithm            | CityAlley1536       | FlowerKids1536      | Lips1536            | RaceNight1536       | RiverBank1536       | Average             | Run time (s)      |
|----------------------|---------------------|---------------------|---------------------|---------------------|---------------------|---------------------|-------------------|
| GAP-TV [2]           | 31.88, 0.860        | 32.89, 0.873        | 33.23, 0.754        | 30.63, 0.799        | 28.43, 0.754        | 31.41, 0.808        | 100.82(CPU)       |
| PnP-FFDNet [3]       | 34.67, 0.894        | 37.62, 0.934        | 33.43, 0.738        | 34.24, 0.827        | 31.15, 0.826        | 34.22, 0.844        | 114.26(GPU)       |
| PnP-FastDVDnet [4]   | 35.40, 0.883        | 35.58, 0.912        | 33.23, 0.728        | 33.57, 0.818        | 31.74, 0.837        | 33.90, 0.836        | 368.54(GPU)       |
| ELP-Unfolding (Ours) | <b>37.79, 0.924</b> | <b>38.57, 0.940</b> | <b>34.82, 0.780</b> | <b>34.99, 0.846</b> | <b>34.32, 0.891</b> | <b>36.10, 0.876</b> | <b>8.206(GPU)</b> |

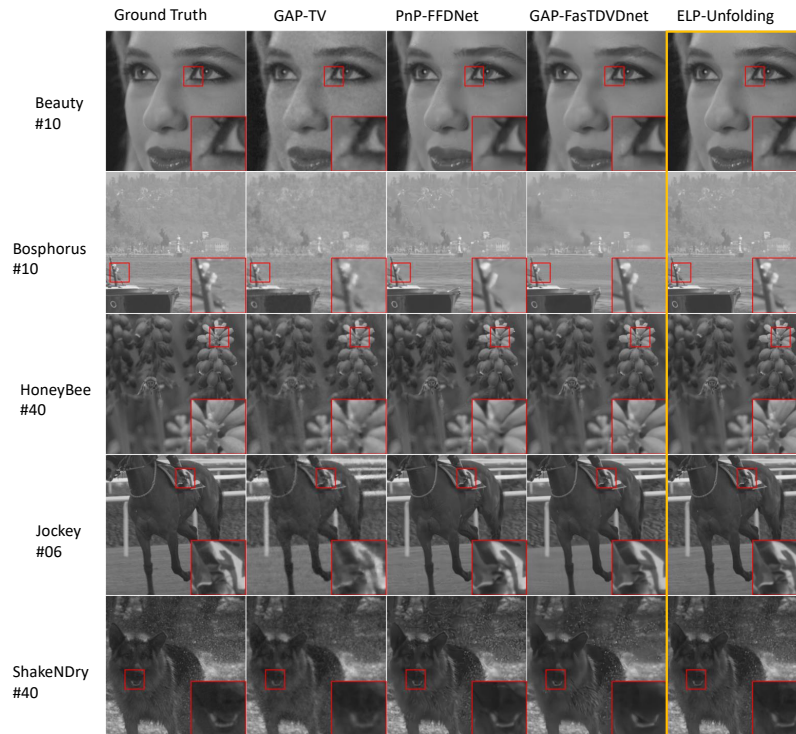

Fig. S4: Scalability: Data size is  $512 \times 512 \times 10$ .

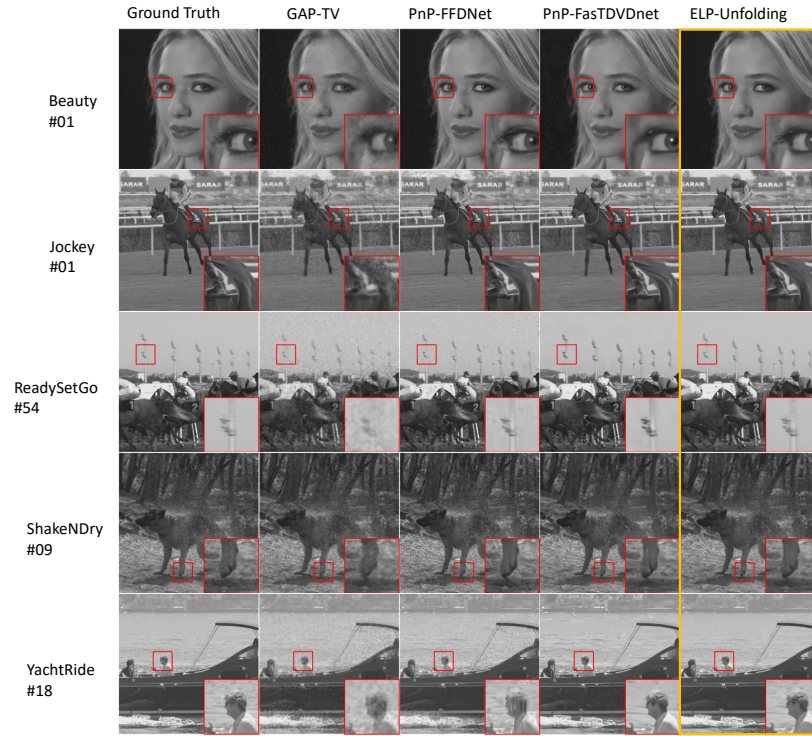

Fig. S5: Scalability: Data size is  $1024 \times 1024 \times 18$ .

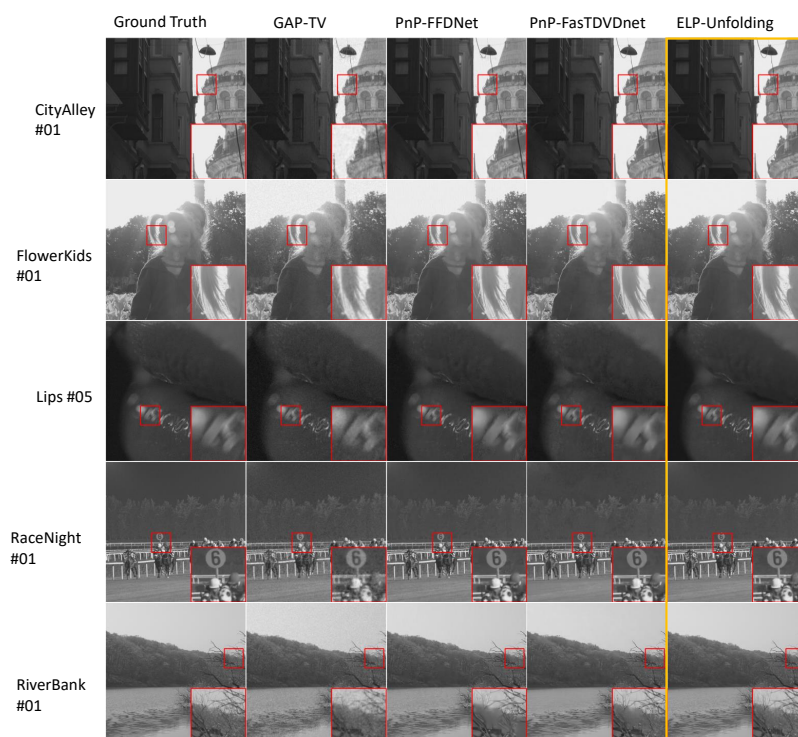

Fig. S6: Scalability: Data size is  $1536 \times 1536 \times 12$ .

## References

1. Mercat, A., Viitanen, M., Vanne, J.: Uvg dataset: 50/120fps 4k sequences for video codec analysis and development. In: Proceedings of the 11th ACM Multimedia Systems Conference. pp. 297–302 (2020) [2](#)
2. Yuan, X.: Generalized alternating projection based total variation minimization for compressive sensing. In: 2016 IEEE International Conference on Image Processing (ICIP). pp. 2539–2543 (September 2016) [1](#), [2](#), [3](#), [4](#)
3. Yuan, X., Liu, Y., Suo, J., Dai, Q.: Plug-and-play algorithms for large-scale snapshot compressive imaging. In: Proceedings of the IEEE/CVF Conference on Computer Vision and Pattern Recognition (CVPR). pp. 1447–1457 (June 2020) [2](#), [3](#), [4](#)
4. Yuan, X., Liu, Y., Suo, J., Durand, F., Dai, Q.: Plug-and-play algorithms for video snapshot compressive imaging. arXiv: 2101.04822 (January 2021) [2](#), [3](#), [4](#)
