# Supplementary material
Source: ML conference proceedings conference paper supplement (https://www.ecva.net/papers/eccv_2022/papers_ECCV/html/136830583_ECCV_2022_paper.php)
Supplement: Supplementary file 2 [file 136830583-supp.zip]

Archive with 9 entries (9 files):
- 1024_mp4/Beauty_1024í┴1024.mp4
- 1024_mp4/Jockey_1024í┴1024.mp4
- 1536_mp4/CityAlley_1536í┴1536.mp4
- 1536_mp4/FlowerKids_1536í┴1536.mp4
- 6271-supp.pdf
- realdata_video/chop.mp4
- realdata_video/Dominoes.mp4
- realdata_video/Hand.mp4
- realdata_video/WaterBalloon.mp4
